# Supplementary material
Source: publisher figshare collection journal article supplement (https://gsapubs.figshare.com/articles/dataset/_/12535373)
Supplement: Supplementary file 1 [file 1]

## Sheet: Table DR2
Table DR2. Rutile composition analyses							Concentrations (wt %)										Concentrations (ppm)									Analytical Error (Counting Statistics, relative %, 1-σ)								Detection Limits (wt. %)
Analysis	Occurrence	Shared boundary	Long axis (microns)	Zr ppm	Zr-Rt (ºC)*	± ºC (1σ)	Nb	Si	Zr	Ti	Al	V	Cr	Fe	O*	Total	Nb	Si	Zr	Ti	Al	V	Cr	Fe	O*	Nb	Si	Zr	Ti	Al	V	Cr	Fe	Nb	Si	Zr	Ti	Al	V	Cr	Fe
327	inclusion	Omp, Amp	110	262.03	716.109	23.1916	0.023909	0.00141	0.026203	60.1367	0.012099	0.074109	0.010687	0.34839	40.3464	100.98	239.09	14.1	262.03	601367	120.99	741.09	106.87	3483.9	403464	6.16703	41.5247	3.23856	0.344087	3.45081	4.23847	24.1092	1.09666	0.00197	0.000825	0.001145	0.016477	0.000567	0.00372	0.003546	0.003623
328	matrix	Omp, Grt	70	244.43	710.12	24.5758	0.024041	0.004702	0.024443	60.1313	0.022496	0.066642	0.005663	0.319153	40.341	100.939	240.41	47.02	244.43	601313	224.96	666.42	56.63	3191.53	403410	6.13443	12.5481	3.4608	0.344097	1.91729	4.64151	44.9247	1.16907	0.00197	0.000825	0.001145	0.016476	0.000567	0.003719	0.003546	0.003623
329	matrix	Omp, Grt, Amp	100	248.71	711.608	24.3986	0.022382	0.004092	0.024871	59.3424	0.018987	0.086309	0.005863	0.30618	39.8152	99.6263	223.82	40.92	248.71	593424	189.87	863.09	58.63	3061.8	398152	6.61247	14.5025	3.42866	0.348923	2.26368	3.75484	43.7382	1.21428	0.001984	0.000831	0.001153	0.016596	0.000571	0.003747	0.003572	0.003649
330	matrix	Omp, Grt, Ap, Amp	100	251.02	712.403	24.2095	0.024977	0.000991	0.025102	59.295	0.028074	0.097196	0.005296	0.318668	39.7977	99.593	249.77	9.91	251.02	592950	280.74	971.96	52.96	3186.68	397977	5.95994	59.464	3.39829	0.349035	1.57357	3.40307	48.3445	1.17888	0.001984	0.000831	0.001153	0.016595	0.000571	0.003746	0.003572	0.003649
331	matrix	Omp, Grt, Amp, Pl	80	285.12	723.481	21.7676	0.023677	0.002233	0.028512	59.1405	0.015881	0.07645	0.008474	0.339459	39.6834	99.3186	236.77	22.33	285.12	591405	158.81	764.5	84.74	3394.59	396834	6.26735	26.4478	3.00873	0.349388	2.6796	4.15663	30.4511	1.12529	0.001983	0.000831	0.001153	0.016591	0.000571	0.003746	0.003571	0.003648
332	matrix	Qz, Grt, Omp, Pl, Amp	265	196.41	691.745	29.7447	0.022522	0.004145	0.019641	59.3521	0.023221	0.083639	0.007514	0.29569	39.8202	99.6287	225.22	41.45	196.41	593521	232.21	836.39	75.14	2956.9	398202	6.57025	14.3128	4.29995	0.348739	1.87426	3.85293	34.2557	1.24557	0.001983	0.000831	0.001152	0.016588	0.000571	0.003745	0.00357	0.003647
333	matrix	Omp, Grt, Amp, Ap	258	342.96	739.996	18.6869	0.022528	0.001522	0.034296	59.0641	0.030192	0.083812	0.009856	0.288305	39.6352	99.1698	225.28	15.22	342.96	590641	301.92	838.12	98.56	2883.05	396352	6.56811	38.741	2.52527	0.349566	1.47153	3.84617	26.2702	1.26926	0.001983	0.000831	0.001152	0.016587	0.000571	0.003745	0.00357	0.003647
334	matrix	Grt, Amp, Pl	165	225.73	703.353	26.4506	0.024176	0.002408	0.022573	59.8755	0.022708	0.092207	0.007495	0.322507	40.1809	100.551	241.76	24.08	225.73	598755	227.08	922.07	74.95	3225.07	401809	6.14318	24.5319	3.76064	0.347157	1.91354	3.55222	34.339	1.16797	0.001983	0.000831	0.001152	0.016586	0.000571	0.003745	0.00357	0.003647
335	matrix	Qz, Pl, Amp	230	238.25	707.932	25.2787	0.026293	0.002095	0.023825	59.2026	0.007111	0.089695	0.009248	0.390142	39.7375	99.4885	262.93	20.95	238.25	592026	71.11	896.95	92.48	3901.42	397375	5.67518	28.1779	3.57078	0.34906	5.81485	3.63404	27.9516	1.01773	0.001983	0.000831	0.001152	0.016583	0.000571	0.003744	0.00357	0.003647
336	inclusion	Qz	98	291.53	725.441	21.3629	0.024118	0.013228	0.029153	59.9341	0.003972	0.084281	0.00704	0.363659	40.2258	100.685	241.18	132.28	291.53	599341	39.72	842.81	70.4	3636.59	402258	6.15662	4.57815	2.94481	0.346918	10.2979	3.82747	36.5141	1.07018	0.001983	0.000831	0.001152	0.016583	0.000571	0.003744	0.00357	0.003647
337	matrix	Grt, Omp, Ap, Amp	224	269.17	718.444	22.8303	0.023838	0.002132	0.026917	59.3155	0.015951	0.072508	0.008034	0.40689	39.817	99.6887	238.38	21.32	269.17	593155	159.51	725.08	80.34	4068.9	398170	6.22564	27.6945	3.17775	0.348736	2.66798	4.34653	32.0802	0.9879	0.001983	0.000831	0.001153	0.016583	0.000571	0.003744	0.00357	0.003647
338	matrix	Grt, Ap, Qz	186	250.62	712.266	24.234	0.02464	0.0042	0.025062	58.9361	0.014348	0.07121	0.008366	0.56505	39.609	99.258	246.4	42	250.62	589361	143.48	712.1	83.66	5650.5	396090	6.03409	14.1256	3.40238	0.349733	2.95149	4.413	30.8222	0.788328	0.001983	0.000831	0.001153	0.016579	0.000571	0.003744	0.003569	0.003647
339	matrix	Qz, Amp	165	235.02	706.77	25.589	0.023187	0.005877	0.023502	59.4944	0.006904	0.066676	0.011804	0.407923	39.9305	99.9708	231.87	58.77	235.02	594944	69.04	666.76	118.04	4079.23	399305	6.39554	10.1423	3.62055	0.348452	5.98973	4.67369	22.0575	0.986832	0.001984	0.000831	0.001153	0.016594	0.000571	0.003747	0.003573	0.00365
340	inclusion	Grt	61	244.21	710.043	24.7965	0.023898	0.005134	0.024421	58.9499	0.022065	0.107772	0.009315	0.57939	39.6474	99.3692	238.98	51.34	244.21	589499	220.65	1077.72	93.15	5793.9	396474	6.21892	11.5966	3.49225	0.350119	1.9685	3.12954	27.7847	0.77623	0.001986	0.000832	0.001154	0.016599	0.000572	0.003748	0.003574	0.003652
341	matrix	Qz, Amp, Pl	83	244.65	710.197	24.7566	0.024757	0.014238	0.024465	58.8484	0.01068	0.081576	0.004888	0.549106	39.5571	99.1152	247.57	142.38	244.65	588484	106.8	815.76	48.88	5491.06	395571	6.01425	4.26916	3.48588	0.350422	3.92302	3.93752	52.3564	0.804545	0.001985	0.000832	0.001154	0.016598	0.000571	0.003748	0.003574	0.003651
342	matrix	Grt, Omp, Ap, Pl	177	241.39	709.05	25.0341	0.022412	0.001729	0.024139	59.3217	0.027797	0.081446	0.008895	0.526385	39.8685	99.883	224.12	17.29	241.39	593217	277.97	814.46	88.95	5263.85	398685	6.60803	34.1564	3.53066	0.349021	1.58933	3.94272	29.0678	0.827756	0.001985	0.000832	0.001154	0.016598	0.000571	0.003748	0.003574	0.003651
343	inclusion	Grt	148	233.25	706.128	25.7609	0.025086	0.001675	0.023325	59.7052	0.025216	0.06863	0.009256	0.476754	40.1031	100.438	250.86	16.75	233.25	597052	252.16	686.3	92.56	4767.54	401031	5.93866	35.2464	3.64819	0.347896	1.73841	4.55996	27.9602	0.885506	0.001985	0.000832	0.001154	0.016597	0.000571	0.003748	0.003574	0.003651
344	matrix	Omp, Qz	184	239.47	708.368	25.1927	0.02406	0.002807	0.023947	59.1534	0.010075	0.081907	BDL	0.449453	39.7178	99.4669	240.6	28.07	239.47	591534	100.75	819.07	BDL	4494.53	397178	6.1759	21.0854	3.55644	0.349451	4.14818	3.92321	72.3533	0.922124	0.001984	0.000831	0.001153	0.016593	0.000571	0.003747	0.003574	0.00365
345	matrix	Grt, Pl, Amp	253	189.71	688.892	30.6776	0.02325	0.001943	0.018971	58.8555	0.020751	0.093328	0.004551	0.686056	39.5989	99.3032	232.5	19.43	189.71	588555	207.51	933.28	45.51	6860.56	395989	6.38294	30.4172	4.45318	0.350327	2.085	3.51951	56.1841	0.694716	0.001986	0.000832	0.001154	0.016595	0.000572	0.003748	0.003574	0.003651
346	matrix	Amp, Grt, Pl, Qz	120	267.88	718.026	22.936	0.021785	0.006126	0.026788	59.6347	0.026671	0.082814	0.010998	0.332977	40.0284	100.171	217.85	61.26	267.88	596347	266.71	828.14	109.98	3329.77	400284	6.7849	9.73466	3.19432	0.348087	1.64989	3.88727	23.6344	1.14174	0.001984	0.000831	0.001153	0.016593	0.000571	0.003747	0.003574	0.00365
347	matrix	Qz, Omp, Amp	133	266.78	717.668	23.0142	0.022433	0.007284	0.026678	58.9803	0.00947	0.084151	0.009835	0.370337	39.5883	99.0989	224.33	72.84	266.78	589803	94.7	841.51	98.35	3703.37	395883	6.59851	8.20851	3.2068	0.349971	4.40364	3.83519	26.3511	1.05707	0.001984	0.000831	0.001153	0.016592	0.000571	0.003747	0.003574	0.00365
348	matrix	Grt, Omp, Pl	107	257.5	714.6	23.7061	0.023174	0.002426	0.02575	58.7406	0.022823	0.084397	0.007774	0.372957	39.4344	98.7143	231.74	24.26	257.5	587406	228.23	843.97	77.74	3729.57	394344	6.39879	24.3694	3.31739	0.350715	1.90621	3.82609	33.1687	1.05182	0.001984	0.000831	0.001153	0.016593	0.000571	0.003747	0.003574	0.00365
349	matrix	Omp, Amp, Pl, Grt	263	366.86	746.156	17.6969	0.024517	0.001541	0.036686	59.3897	0.019162	0.074478	0.007979	0.393304	39.8695	99.8168	245.17	15.41	366.86	593897	191.62	744.78	79.79	3933.04	398695	6.06578	38.2931	2.37174	0.348721	2.24485	4.25107	32.3313	1.01256	0.001984	0.000831	0.001153	0.01659	0.000571	0.003747	0.003574	0.00365
350	matrix	Pl, Grt	63	240.19	708.624	25.1224	0.02425	0.011691	0.024019	59.3183	0.030146	0.104191	0.008887	0.412021	39.8583	99.7918	242.5	116.91	240.19	593183	301.46	1041.91	88.87	4120.21	398583	6.12877	5.16589	3.54523	0.348907	1.47458	3.21493	29.0893	0.979722	0.001984	0.000831	0.001153	0.016588	0.000571	0.003746	0.003574	0.003649
351	matrix	Omp, Grt, Amp	98	290.52	725.134	21.44	0.024649	0.001772	0.029052	59.3788	0.01492	0.095029	0.010008	0.517253	39.9022	99.9737	246.49	17.72	290.52	593788	149.2	950.29	100.08	5172.53	399022	6.03485	33.3167	2.95669	0.34863	2.84499	3.46584	25.8989	0.837116	0.001984	0.000831	0.001153	0.016585	0.000571	0.003746	0.003573	0.003649
352	matrix	Grt, Qz, Amp, Pl	265	292.65	725.779	21.3037	0.02556	0.002759	0.029265	59.6132	0.018372	0.08463	0.0077	0.386852	40.0201	100.188	255.6	27.59	292.65	596132	183.72	846.3	77	3868.52	400201	5.82999	21.4366	2.93528	0.347962	2.33487	3.81555	33.4712	1.02423	0.001983	0.000831	0.001153	0.016584	0.000571	0.003746	0.003573	0.003649
353	matrix	Grt, Qz, Amp, Pl	150	214.41	699.028	27.6269	0.025081	0.002776	0.021441	59.6712	0.02578	0.093407	0.008869	0.324168	40.0492	100.222	250.81	27.76	214.41	596712	257.8	934.07	88.69	3241.68	400492	5.9345	21.3008	3.95219	0.347823	1.70171	3.51523	29.1467	1.16387	0.001983	0.000831	0.001153	0.016584	0.000571	0.003745	0.003573	0.003648
354	inclusion	Grt	61	252.61	712.946	24.0703	0.024709	0.005899	0.025261	59.9464	0.005047	0.073192	0.00792	0.323764	40.2093	100.622	247.09	58.99	252.61	599464	50.47	731.92	79.2	3237.64	402093	6.01733	10.0954	3.37618	0.346948	8.13567	4.31241	32.5579	1.16472	0.001983	0.000831	0.001152	0.016581	0.000571	0.003745	0.003573	0.003648
355	matrix	Omp	136	226.95	703.808	26.3422	0.022169	0.005789	0.022695	59.6262	0.011764	0.083963	0.004862	0.34923	40.0102	100.137	221.69	57.89	226.95	596262	117.64	839.63	48.62	3492.3	400102	6.67141	10.29	3.74281	0.348009	3.57097	3.84163	52.6417	1.10257	0.001983	0.000831	0.001153	0.016586	0.000571	0.003746	0.003574	0.003649
356	matrix	Ap, Amp, Omp, Pl	123	203.32	694.604	28.8929	0.021922	0.001729	0.020332	59.8822	0.012012	0.08018	0.009025	0.3653	40.1806	100.573	219.22	17.29	203.32	598822	120.12	801.8	90.25	3653	401806	6.74113	34.1191	4.15963	0.34717	3.49914	3.99226	28.6563	1.06708	0.001983	0.000831	0.001153	0.016582	0.000571	0.003745	0.003574	0.003648
O* - Oxygen calculated by stoichiometry
Mineral abbreviations after Whitney and Evans, 2010
*Zr-in-rutile temperatures were calculated assuming a pressure of 28 kbar
